# Supplementary material for: Opioids for Osteoarthritis: Cross-Sectional Survey of Patient Perspectives and Satisfaction
Source: MDPI journal article supplement (doi:10.3390/jcm12072733), 2023-04-06

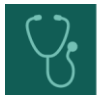

---

Supplementary Materials

Table S1 Reasons for choice of current medication for patients with osteoarthritis (physician-reported)

Table S2 Issues with current medication regimen of patients with osteoarthritis (physician-reported)

Figure S1. Adelphi Real World - Disease Specific Programmes (DSPs) Methodology

Table S1 Reasons for choice of current medication for patients with osteoarthritis (physician-reported)

|                                                                                         | Nonopioid<br>regimens<br>(n = 471) | Opioid regimens<br>(n = 185) |
|-----------------------------------------------------------------------------------------|------------------------------------|------------------------------|
| <b>Efficacy</b>                                                                         |                                    |                              |
| Effective relief of pain at rest                                                        | 39 (8.3)                           | 24 (13.0)                    |
| Effective relief of pain on movement                                                    | 61 (13.0)                          | 43 (23.2)                    |
| Reduces number of tender/swollen joints                                                 | 45 (9.6)                           | 22 (11.9)                    |
| Maintains symptomatic relief over time without need to<br>increase dose/alter frequency | 33 (7.0)                           | 31 (16.8)                    |
| Rapid onset of action                                                                   | 64 (13.6)                          | 16 (8.6)                     |
| Effective in controlling acute flares                                                   | 38 (8.1)                           | 17 (9.2)                     |
| Slows disease progression                                                               | 133 (28.2)                         | 52 (28.1)                    |
| Delays the need for surgery                                                             | 74 (15.7)                          | 31 (16.8)                    |
| <b>Safety</b>                                                                           |                                    |                              |
| Safe long-term use                                                                      | 104 (22.1)                         | 27 (14.6)                    |
| Good gastrointestinal safety                                                            | 138 (29.3)                         | 26 (14.1)                    |
| Low incidence of serious adverse events/severe side<br>effects                          | 37 (7.9)                           | 16 (8.6)                     |
| Suitable for patients with cardiovascular risk                                          | 61 (13.0)                          | 10 (5.4)                     |
| Can be used continuously (without a drug break)                                         | 28 (5.9)                           | 8 (4.3)                      |
| Appropriate for use in the elderly (>65 years)                                          | 50 (10.6)                          | 21 (11.4)                    |
| No need for frequent monitoring/testing                                                 | 44 (9.3)                           | 17 (9.2)                     |
| Low risk of addiction/abuse                                                             | 16 (3.4)                           | 49 (26.5)                    |
| Can be used in combination with other pain drugs                                        | 16 (3.4)                           | 11 (5.9)                     |
| <b>Quality of life</b>                                                                  |                                    |                              |
| Improves/maintains attendance at work                                                   | 16 (3.4)                           | 10 (5.4)                     |
| Improves/maintains ability to perform activities of daily<br>living/leisure activities  | 33 (7.0)                           | 18 (9.7)                     |
| Improves/maintains relationships/social life                                            | 18 (3.8)                           | 13 (7.0)                     |
| Improves patient functionality                                                          | 53 (11.3)                          | 25 (13.5)                    |
| Improves patient's sleep patterns/quality of sleep                                      | 16 (3.4)                           | 10 (5.4)                     |
| Improves/maintains patient's independence                                               | 26 (5.5)                           | 15 (8.1)                     |
| <b>Cost considerations</b>                                                              |                                    |                              |
| Low out of pocket cost/affordability for patient                                        | 58 (12.3)                          | 26 (14.1)                    |
| Low cost/affordable for physician/practice                                              | -                                  | -                            |
| <b>Convenience/acceptability</b>                                                        |                                    |                              |
| Ease of administration for patient                                                      | 17 (3.6)                           | 14 (7.6)                     |
| Convenient dosing schedule                                                              | 22 (4.7)                           | 20 (10.8)                    |
| Physician familiarity/experience                                                        | 9 (1.9)                            | 6 (3.2)                      |
| On formulary/hospital approved drug list                                                | 10 (2.1)                           | 7 (3.8)                      |

---

|                                                                |          |          |
|----------------------------------------------------------------|----------|----------|
| Can be used in combination with other osteoarthritis therapies | 11 (2.3) | 11 (5.9) |
| Accordance with treatment guidelines                           | 2 (0.4)  | 4 (2.2)  |

---

Data are n (%). All patients prescribed current medication regimen for  $\geq 7$  days. The data reflect responses for multiple drugs per patient if the patient was prescribed >1 drug. Physicians were asked, "For each drug therapy the patient is currently prescribed for their osteoarthritis please record all reasons which influenced your choice in selecting the patient's current drug(s)".

Table S2 Issues with current medication regimen of patients with osteoarthritis (physician-reported)

| Category                              | Response options                                  | Nonopioid regimens (n = 471) | Opioid regimens (n = 185) |
|---------------------------------------|---------------------------------------------------|------------------------------|---------------------------|
| No current issues                     | No current issues                                 | 371 (78.8)                   | 102 (55.1)                |
| Lack of efficacy                      | Lack of efficacy                                  | 66 (14.0)                    | 52 (28.1)                 |
| Patient decision                      | Poor patient compliance                           | 10 (2.1)                     | 3 (1.6)                   |
|                                       | Patient requested change                          | -                            | -                         |
|                                       | Inconvenient dosing frequency                     | 7 (1.5)                      | 9 (4.9)                   |
|                                       | Treatment break/holiday                           | -                            | -                         |
| Drug interactions/comorbidities       | Drug interactions                                 | 2 (0.4)                      | 2 (1.1)                   |
|                                       | Comorbidities                                     | 0 (0.0)                      | 3 (1.6)                   |
| Adverse events or tolerability issues | Tiredness/fatigue                                 | 11 (2.3)                     | 27 (14.6)                 |
|                                       | Constipation                                      | 4 (0.8)                      | 28 (15.1)                 |
|                                       | Nausea/vomiting                                   | 7 (1.5)                      | 4 (2.2)                   |
|                                       | Drowsiness                                        | 6 (1.3)                      | 18 (9.7)                  |
|                                       | Dizziness                                         | 1 (0.2)                      | 9 (4.9)                   |
|                                       | Difficulty concentrating                          | 0 (0.0)                      | 4 (2.2)                   |
|                                       | Blurred vision                                    | 0 (0.0)                      | 1 (0.5)                   |
|                                       | Headaches                                         | 3 (0.6)                      | 5 (2.7)                   |
|                                       | Sleep problems/disturbances                       | 0 (0.0)                      | 6 (3.2)                   |
|                                       | Dry mouth                                         | 5 (1.1)                      | 14 (7.6)                  |
|                                       | Skin irritation                                   | -                            | -                         |
|                                       | Administration reaction                           | 1 (0.2)                      | 0 (0.0)                   |
| Worries about addiction               | Worries about addiction                           | 4 (0.8)                      | 16 (8.6)                  |
| Cost or access issues                 | Cheaper drug                                      | 1 (0.2)                      | 1 (0.5)                   |
|                                       | Insurance restrictions                            | 3 (0.6)                      | 1 (0.5)                   |
|                                       | Patient out of pocket expense                     | 0 (0.0)                      | 2 (1.1)                   |
|                                       | Formulary driven switch                           | -                            | -                         |
|                                       | Fewer administrative hurdles                      | -                            | -                         |
|                                       | Resource changes in clinic/practice forced switch | -                            | -                         |
| Other                                 | Other (specify)                                   | 3 (0.6)                      | 2 (1.1)                   |

Data are n (%). All patients prescribed current medication regimen for  $\geq 7$  days. Physicians were asked “Please record any current issues the patient may be having with their current drug regimen”.

Figure S1. Adelphi Real World - Disease Specific Programmes (DSPs) Methodology

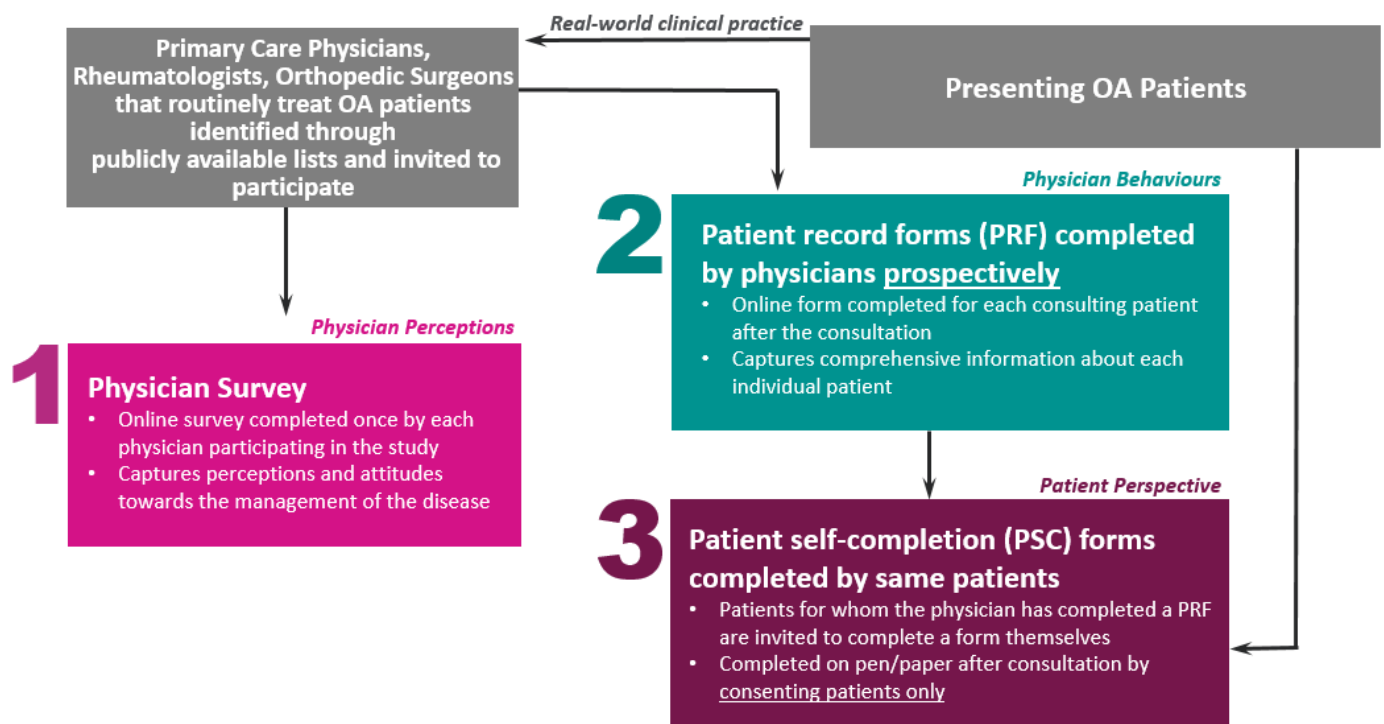

Supplement: s1 [file s1]
